# Supplementary material for: Electroselective α-bromination of acetophenone using in situ bromonium ions from ammonium bromide
Source: Royal Society of Chemistry journal article supplement (doi:10.1039/c6ra04541c), 2016-01-01
Supplement: c6ra04541c1.pdf [file c6ra04541c1.pdf]

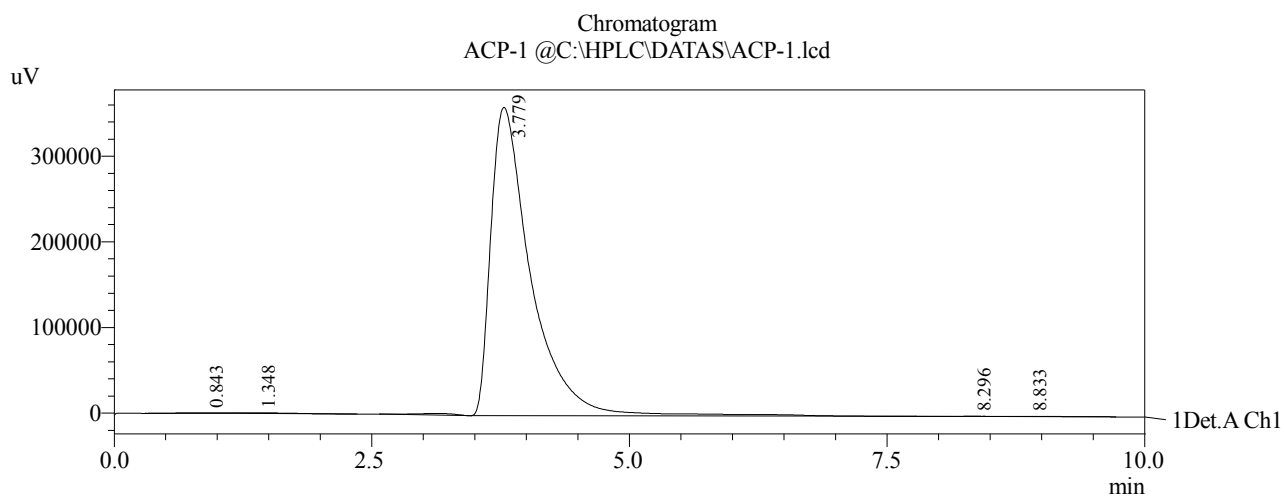

PeakTable

Detector A Ch1 254nm

| Peak# | Ret. Time | Area    | Height | Area %  | Height % |
|-------|-----------|---------|--------|---------|----------|
| 1     | 0.843     | 30150   | 793    | 0.302   | 0.217    |
| 2     | 1.348     | 37205   | 933    | 0.373   | 0.256    |
| 3     | 3.135     | 54501   | 1949   | 0.546   | 0.534    |
| 4     | 3.779     | 9828940 | 360091 | 98.447  | 98.746   |
| 5     | 8.296     | 19829   | 426    | 0.199   | 0.117    |
| 6     | 8.833     | 13325   | 474    | 0.133   | 0.130    |
| Total |           | 9983949 | 364666 | 100.000 | 100.000  |

**HPLC –Chromatogram of acetophenone**

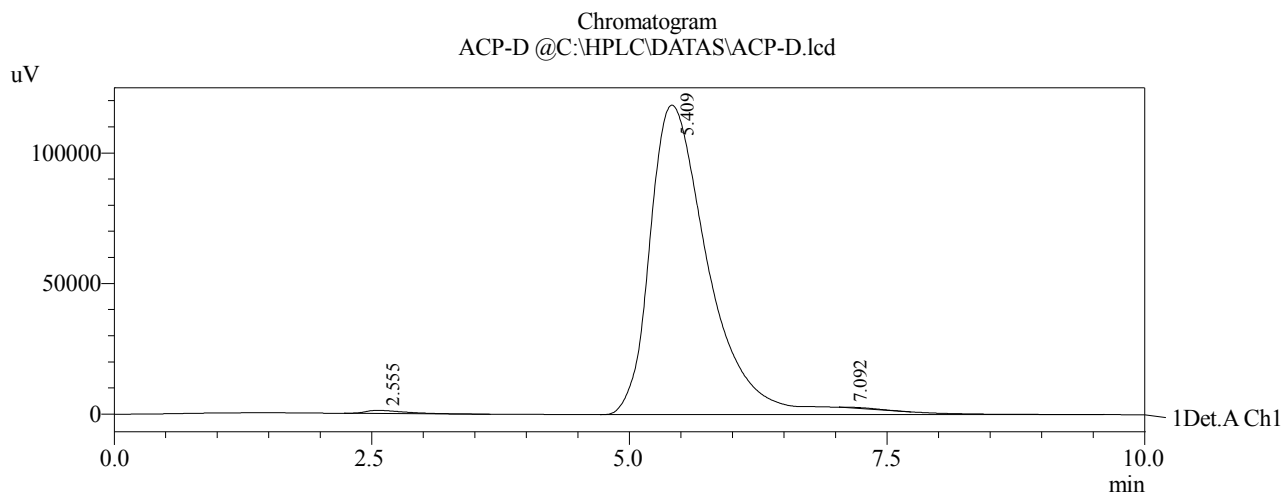

PeakTable

Detector A Ch1 254nm

| Peak# | Ret. Time | Area    | Height | Area %  | Height % |
|-------|-----------|---------|--------|---------|----------|
| 1     | 2.555     | 32561   | 1186   | 0.680   | 0.990    |
| 2     | 5.409     | 4748057 | 118486 | 99.172  | 98.885   |
| 3     | 7.092     | 7104    | 149    | 0.148   | 0.125    |
| Total |           | 4787722 | 119822 | 100.000 | 100.000  |

**HPLC –Chromatogram of phenacyl bromide**

Chromatogram  
2-ACP-H11- @C:\HPLC\DATAS\2-ACP-H11-.lcd

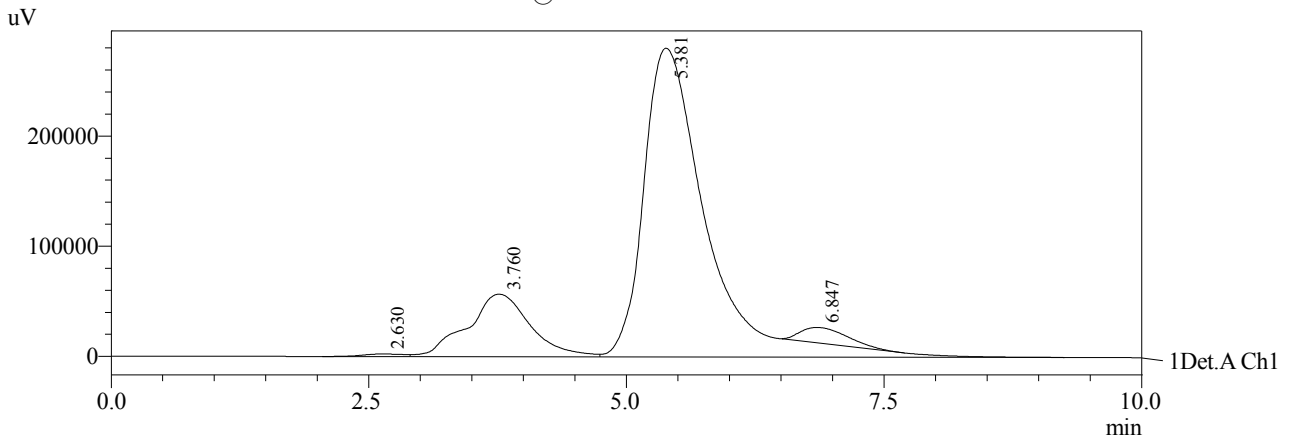

1 Det.A Ch1 / 254nm

PeakTable

Detector A Ch1 254nm

| Peak# | Ret. Time | Area     | Height | Area %  | Height % |
|-------|-----------|----------|--------|---------|----------|
| 1     | 2.630     | 35950    | 1621   | 0.242   | 0.459    |
| 2     | 3.760     | 2746334  | 62414  | 18.498  | 18.270   |
| 3     | 5.381     | 11920830 | 280288 | 80.201  | 79.335   |
| 4     | 6.847     | 160488   | 8973   | 1.059   | 1.936    |
| Total |           | 14863602 | 353296 | 100.000 | 100.000  |

**HPLC –Chromatogram of reaction mixture**

PROTON CDCl3 {D:\bio} KOPAL 1

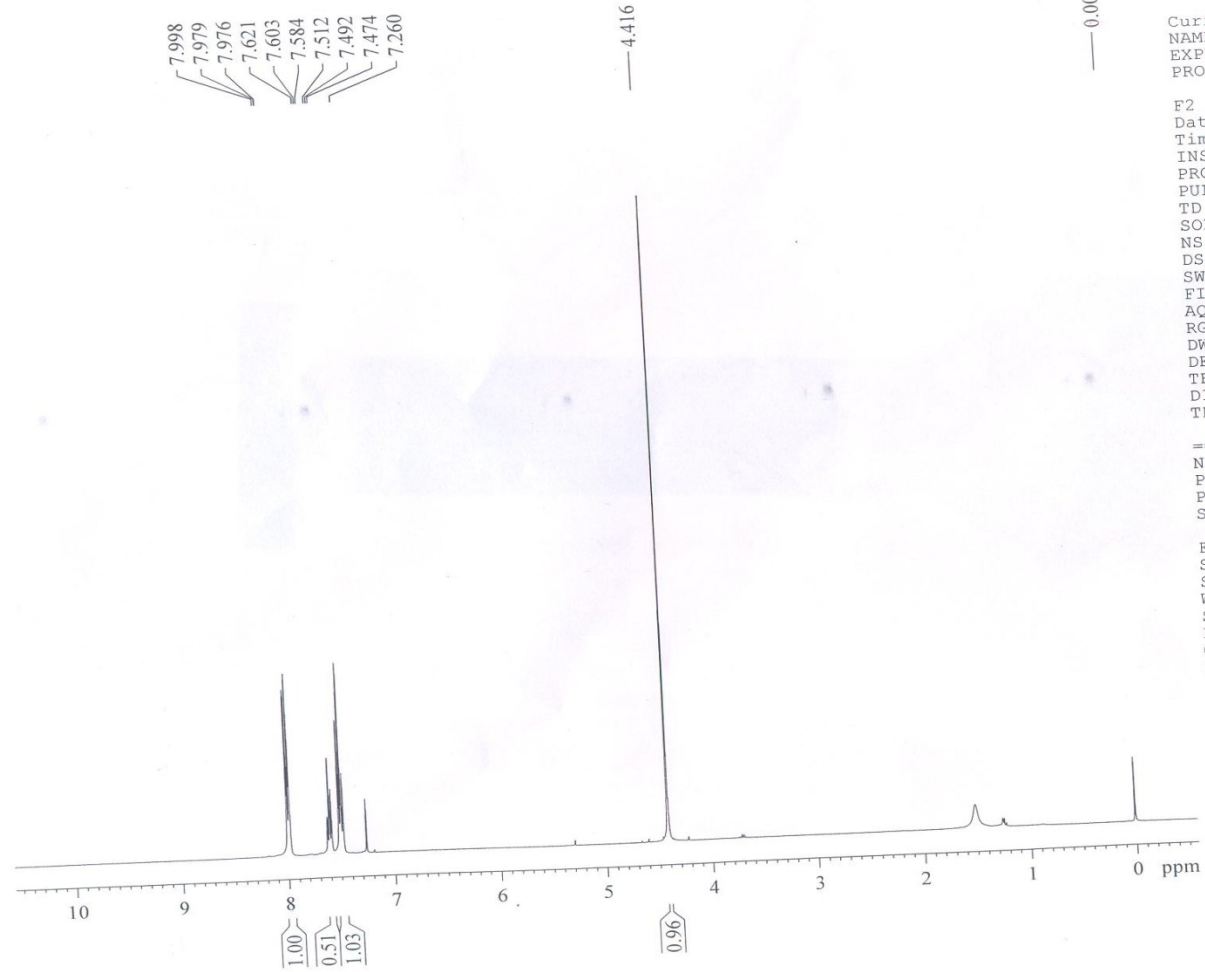

Current Data Parameters  
NAME ACPH-Br  
EXPNO 1  
PROCNO 1

F2 - Acquisition Parameters  
Date\_ 20150130  
Time 14.22  
INSTRUM spect  
PROBHD 5 mm DUL 13C-1  
PULPROG zg30  
TD 65536  
SOLVENT CDCl3  
NS 16  
DS 2  
SWH 8223.685 Hz  
FIDRES 0.125483 Hz  
AQ 3.9846387 sec  
RG 228  
DW 60.800 usec  
DE 6.00 usec  
TE 295.8 K  
D1 1.00000000 sec  
TDO 1

==== CHANNEL f1 =====  
NUC1 1H  
P1 11.42 usec  
PL1 -3.00 dB  
SFO1 400.1324710 MHz

F2 - Processing parameters  
SI 32768  
SF 400.1300049 MHz  
WDW EM  
SSB 0  
LB 0.30 Hz  
GB 0  
PC 1.00

**<sup>1</sup>H NMR spectra of separated phenacyl bromide product**

PROTON CDC13 {D:\BIOINFO} KOPAL 1

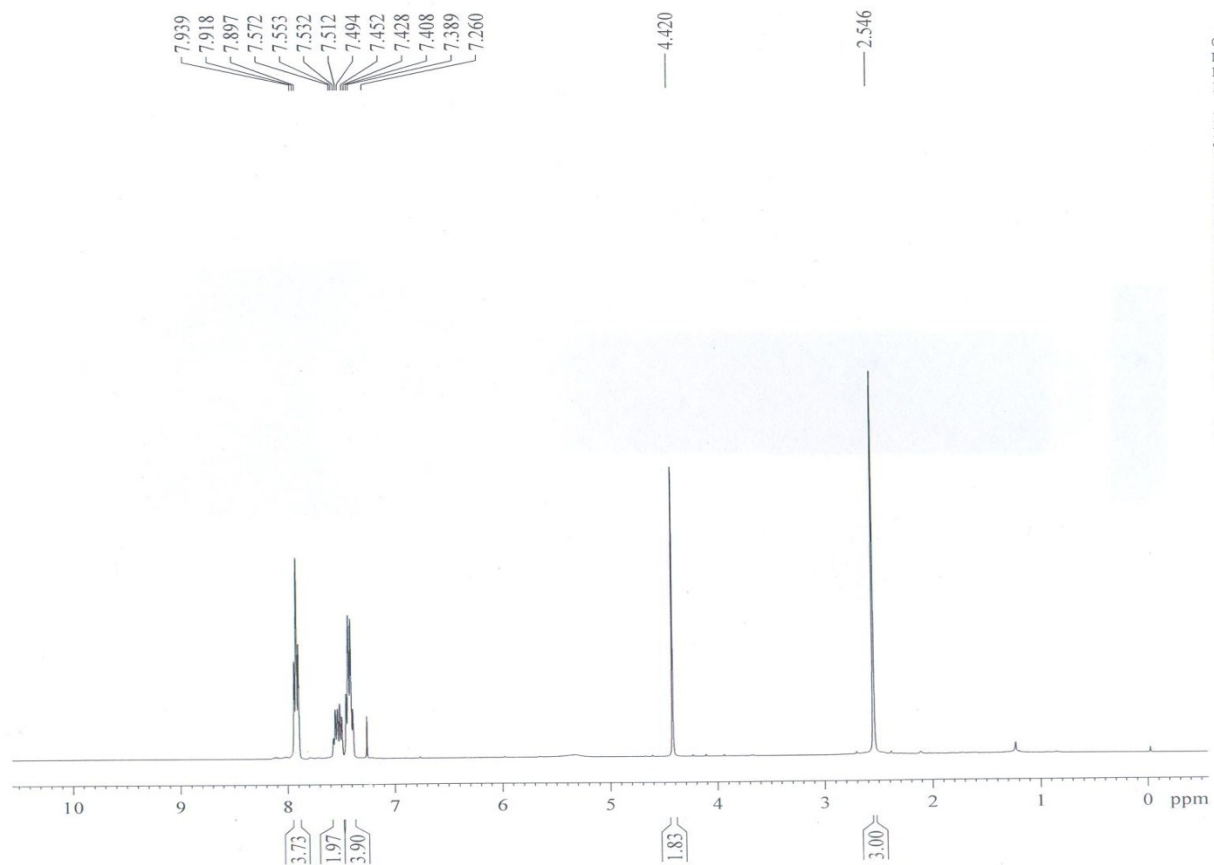

Current Data Parameters  
NAME BIC-1  
EXPNO 1  
PROCNO 1

F2 - Acquisition Parameters  
Date\_ 20150113  
Time 14.15  
INSTRUM spect  
PROBHD 5 mm DUL 13C-1  
PULPROG zg30  
TD 65536  
SOLVENT CDC13  
NS 16  
DS 2  
SWH 8223.685 Hz  
FIDRES 0.125483 Hz  
AQ 3.9846387 sec  
RG 36  
DW 60.800 usec  
DE 6.00 usec  
TE 295.2 K  
D1 1.00000000 sec  
TDO 1

----- CHANNEL f1 -----  
NUC1 1H  
P1 11.42 usec  
PL1 -3.00 dB  
SFO1 400.1324710 MHz

F2 - Processing parameters  
SI 32768  
SF 400.1300045 MHz  
WDW EM  
SSB 0  
LB 0.30 Hz  
GB 0  
PC 1.00

**<sup>1</sup>H NMR spectra of crude sample**

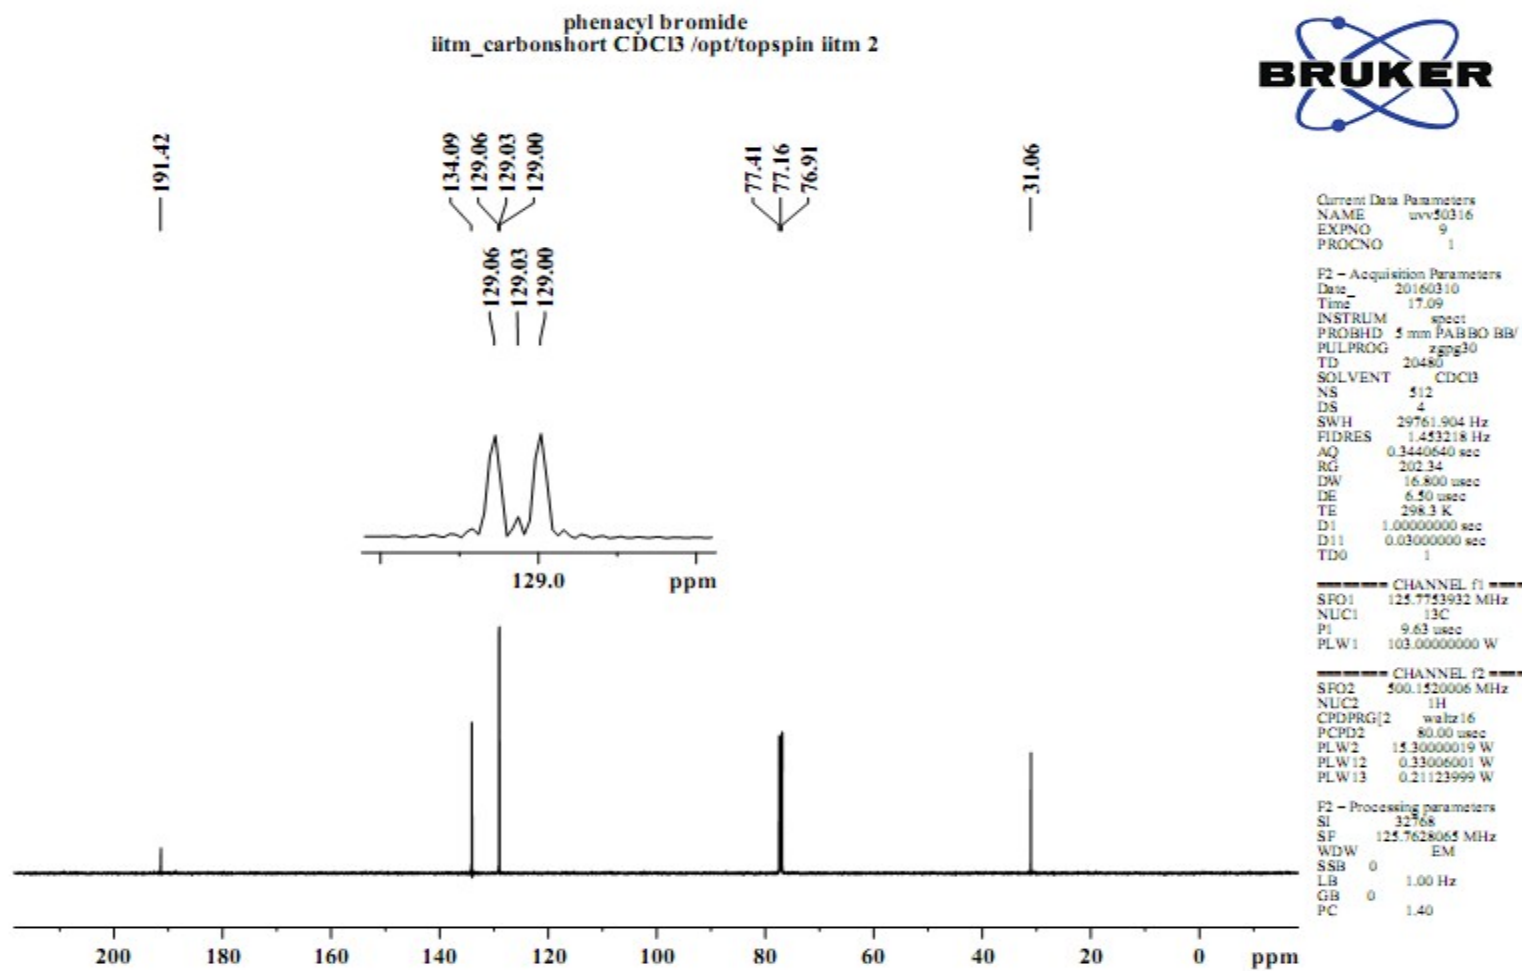

<sup>13</sup>C NMR spectra of separated phenacyl bromide product
